# Supplementary material for: Canary Seed (Phalaris canariensis L.) Peptides Prevent Obesity and Glucose Intolerance in Mice Fed a Western Diet
Source: MDPI journal article supplement (doi:10.3390/ijms232314927), 2022-11-29
Supplement: s1 [file s1]

## Supplementary Materials

# Canary Seed (*Phalaris canariensis* L.) Peptides Prevent Obesity and Glucose Intolerance in Mice Fed a Western Diet

Uriel Urbizo-Reyes <sup>1,2,\*</sup>, Andrea M. Liceaga <sup>1,2,\*</sup>, Lavanya Reddivari <sup>2</sup>, Shiyu Li <sup>2</sup>, Kee-Hong Kim <sup>2</sup>, Abigail D. Cox <sup>3</sup> and Joseph M. Anderson <sup>4</sup>

<sup>1</sup> Protein Chemistry and Bioactive Peptides Laboratory, 745 Agriculture Mall Drive, West Lafayette, IN 47907, USA

<sup>2</sup> Department of Food Science, Purdue University, 745 Agriculture Mall Drive, West Lafayette, IN 47907, USA

<sup>3</sup> College of Veterinary Medicine, Purdue University, 625 Harrison Street, West Lafayette, IN 47907, USA

<sup>4</sup> Department of Agronomy, Purdue University, 915 W. State St., West Lafayette, IN 47907, USA

\* Correspondence: alicaga@purdue.edu

**Table S1.** Qualitative assessment of the vesicle size of each ORO slide.

| Mouse         | Macro-vesicular | Micro-vesicular | Negligible | PHOTO |
|---------------|-----------------|-----------------|------------|-------|
| Orlistat_3 c2 | x               | x               |            |       |
| Western_1 c2  | x               |                 |            |       |
| 250_2 c1      |                 | x               |            | x     |
| 250_3 c1      |                 | x               |            |       |
| 250_0 c1      |                 | x               |            |       |
| 250_1 c1      | x               | x               |            |       |
| 250_2 c2      | x               | x               |            |       |
| orlistat_0 c2 |                 | x               |            |       |
| 500_2 c2      |                 | x               |            |       |
| 250_1         |                 | x               |            |       |
| lowcal_1 c1   |                 |                 | x          |       |
| orlistat_1 c1 |                 |                 | x          |       |
| western_3 c1  | x               | x               |            |       |
| western_0 c2  | x               |                 |            |       |
| Western_1 c1  | x               |                 |            |       |
| western_0 c1  | x               |                 |            | x     |
| lowcal_3 c1   |                 |                 | x          |       |
| lowcal_1 c2   |                 |                 | x          |       |
| 500_3 c2      | x               |                 |            |       |
| orlistat_2 c2 |                 |                 | x          |       |

|               |   |   |   |   |
|---------------|---|---|---|---|
| lowcal_0 c2   |   |   | x |   |
| lowcal_2 c1   |   |   | x | x |
| 500_2 c1      |   | x |   |   |
| 500_3 c1      |   | x |   |   |
| lowcal_2 c2   |   | x |   |   |
| orlistat_3 c1 |   |   | x |   |
| orlistat_1 c2 |   | x |   |   |
| lowcal_0 c1   |   |   | x |   |
| 250_3 c2      | x | x |   |   |
| orlistat_2 c1 |   | x |   | x |
| western_2 c2  | x |   |   |   |
| 500_0 c1      |   |   | x |   |
| lowcal_3 c2   |   | x |   |   |
| western_3 c2  | x |   |   |   |
| orlistat_0 c1 |   |   | x |   |
| 500_1 c1      |   | x |   | x |
| 250_0 c2      | x |   |   |   |
| western_2 c1  | x |   |   |   |
| 500_0 c2      |   | x |   |   |
| 500_1 c2      | x |   |   |   |

**Table S2.** Histological criteria of examination.

| Item                                                                                                                                                                     | Definition                            | Score       |
|--------------------------------------------------------------------------------------------------------------------------------------------------------------------------|---------------------------------------|-------------|
| Steatosis                                                                                                                                                                | Macro-vesicular                       | Qualitative |
|                                                                                                                                                                          | Micro-vesicular                       | Qualitative |
|                                                                                                                                                                          | negligible                            | Qualitative |
| Liver cell injury                                                                                                                                                        | None                                  | 0           |
|                                                                                                                                                                          | Few balloon cells (rare but definite) | 1           |
|                                                                                                                                                                          | Many cells/prominent ballooning       | 2           |
| Lobular inflammation<br>(200x)                                                                                                                                           | No foci                               | 0           |
|                                                                                                                                                                          | <2 foci per 200X field                | 1           |
|                                                                                                                                                                          | 2-4 foci per 200x field               | 2           |
|                                                                                                                                                                          | >4 foci per 200x field                | 3           |
| Adapted from Kleiner, David E., et al. "Design and validation of a histological scoring system for nonalcoholic fatty liver disease." Hepatology 41.6 (2005): 1313-1321. |                                       |             |

**Table S3.** Primer sequences used for hepatic gene expression analysis.

| <b>Primer</b>  | <b>Forward Sequence (5'-3')</b> |
|----------------|---------------------------------|
| act-1 forward  | TCCAAGAGAGGTATCCTTAC            |
| act-1 reverse  | CGGTTAGCCTTTGGATTGAG            |
| daf-16 forward | CTTCAAGCCAATGCCACTACC           |
| daf-16 reverse | GGAGATGAGTTGGATGTTGATAGC        |
| skn-1 forward  | GACGTCAATTTATGGAGTGTCG          |
| skn-1 reverse  | GAAGATGTTTTGTCGTGATCCG          |
| sod-3 forward  | CCAACCAGCGCTGAAATTCAATGG        |
| sod-3 reverse  | GGAACCGAAGTCGCGCTTAATAGT        |
| gst-4 forward  | TGGAGACTCATTGACTTGGG            |
| gst-4 reverse  | TCCTTTCTTGTTGCCACG              |
| gst-10 forward | CGTGCCACAACCTTTACTACTTC         |
| gst-10 reverse | CAA CTG ACC AAG GAG CAT TC      |
